# Supplementary material for: Brain Reorganization following Intervention in Children with Congenital Hemiplegia: A Systematic Review
Source: Hindawi journal article supplement (doi:10.1155/2013/356275), 2013-01-01
Supplement: f1 [file 356275.f1.pdf]

Hand open/close <sup>[16]</sup> 2/3 (M1c) ↑ area of activation  
2/3 (CBM) ↑ area of activation

-

Training dose was variable  
in the 3 cases

Abbreviations: PH: paretic hand; N-PH: non paretic hand; fMRI: functional magnetic resonance imaging; VBM: voxel-based morphometry; TMS: transcranial magnetic stimulation, MEG: magnetoencephalography; M1: primary motor cortex; FP: fronto-parietal; M1S1: primary-sensorymotor cortex, **M2S2c secondary sensory-motor cortex** c/i: indicate contralateral/ipsilateral, CBM: cerebellum, IHF interhemispheric fissure (including cingulate motor area supplementary motor area), PMC: premotor cortex; LI: lateral Index; LI is calculated  $[(\text{contralateral-ipsilateral})/(\text{contralateral+ipsilateral})]$ ; SMA Supplementary motor area, MEPs: motor evoked potentials; SEF: somatosensory evoked potentials

**Table 1s: Supplementary material: Clinical Outcome measure and results**

| Study                         | Clinical Outcome measure                  | n° | Results       |                |           |
|-------------------------------|-------------------------------------------|----|---------------|----------------|-----------|
|                               |                                           |    | Pre-treatment | Post-treatment | Follow-up |
| <b>[13]</b><br>(n. sample= 5) | <b>BODY FUNCTIONS AND STRUCTURES</b>      |    |               |                |           |
|                               | Grip strength mmHg:                       | 1# | 60            | 50.7           | n/a       |
|                               | <b>ACTIVITY</b>                           |    |               |                |           |
|                               | QUEST                                     | 1# | 23.1          | 24.7           | n/a       |
|                               | AHA                                       |    | 25            | 27             | n/a       |
|                               | <b>PARTICIPATION</b>                      |    |               |                |           |
|                               | P-MAL AOU                                 | 1# | 1.8           | 1.4            | n/a       |
|                               | <i>Disregard index</i> <sup>§</sup> -12.9 | 1# |               |                |           |
|                               | <b>BODY FUNCTIONS AND STRUCTURES</b>      |    |               |                |           |
|                               | Grip strength mmHg                        | 2# | 30.7          | 39.3           | n/a       |
|                               | <b>ACTIVITY</b>                           |    |               |                |           |
|                               | QUEST                                     | 2# | 30.8          | 34.7           | n/a       |
|                               | AHA                                       |    | 44            | 46             | n/a       |
|                               | <b>PARTICIPATION</b>                      |    |               |                |           |
|                               | P-MAL AOU                                 | 2# | 1.6           | 2.3*           | n/a       |
|                               | <i>Disregard index</i> <sup>§</sup> -1.2  | 2# |               |                |           |
|                               | <b>BODY FUNCTIONS AND STRUCTURES</b>      |    |               |                |           |
|                               | Grip strength mmHg                        | 3# | 102.7         | 129.7*         | n/a       |
|                               | <b>ACTIVITY</b>                           |    |               |                |           |
|                               | QUEST                                     | 3# | 69.2          | 68.7           | n/a       |
|                               | AHA                                       |    | 68            | 76*            | n/a       |
|                               | <b>PARTICIPATION</b>                      |    |               |                |           |
|                               | P-MAL AOU                                 | 3# | 0.6           | 4.7*           | n/a       |
|                               | <i>Disregard index</i> <sup>§</sup> 57.2  | 3# |               |                |           |
|                               | <b>BODY FUNCTIONS AND STRUCTURES</b>      |    |               |                |           |

|                                                                            |                                   |                |                          |                                                                    |                                                                   |                               |        |
|----------------------------------------------------------------------------|-----------------------------------|----------------|--------------------------|--------------------------------------------------------------------|-------------------------------------------------------------------|-------------------------------|--------|
|                                                                            | Grip strength mmHg:               | 4#             | 80                       |                                                                    | 101.7*                                                            | n/a                           |        |
|                                                                            | ACTIVITY                          |                |                          |                                                                    |                                                                   |                               |        |
|                                                                            | QUEST                             | 4#             | 72.6                     |                                                                    | 79.0*                                                             | n/a                           |        |
|                                                                            | AHA                               |                | 62                       |                                                                    | 68*                                                               | n/a                           |        |
|                                                                            | PARTICIPATION                     |                |                          |                                                                    |                                                                   |                               |        |
|                                                                            | P-MAL AOU                         | 4#             | 0.53                     |                                                                    | 3.3*                                                              | n/a                           |        |
|                                                                            | Disregard index <sup>s</sup> 62.6 | 4#             |                          |                                                                    |                                                                   |                               |        |
|                                                                            | BODY FUNCTIONS AND STRUCTURES     |                |                          |                                                                    |                                                                   |                               |        |
|                                                                            | Grip strength mmHg:               | 5#             | 200                      |                                                                    | 206.7                                                             | n/a                           |        |
|                                                                            | ACTIVITY                          |                |                          |                                                                    |                                                                   |                               |        |
|                                                                            | QUEST                             | 5#             | 84.8                     |                                                                    | 94.7*                                                             | n/a                           |        |
|                                                                            | AHA                               |                | 76                       |                                                                    | 80                                                                | n/a                           |        |
|                                                                            | PARTICIPATION                     |                |                          |                                                                    |                                                                   |                               |        |
|                                                                            | P-MAL AOU                         | 5#             | 3.8                      |                                                                    | 3.7                                                               | n/a                           |        |
| Disregard index <sup>s</sup> 8.8                                           | 5#                                |                |                          |                                                                    |                                                                   |                               |        |
| [14]<br>(n. sample= 10)                                                    | PARTICIPATION                     |                | BASELINE <sup>^</sup>    |                                                                    | PRE-TREATMENT <sup>^^</sup>                                       | POST-TREATMENT <sup>^^^</sup> |        |
|                                                                            | P-MAL-AUS-R                       | 10             | 1.6± 0.8 points<br>14.9% | 1.8 ± 0.8 points<br>No difference<br>change respect<br>to baseline | 4.2 ± 0.7 points<br>50.8%*<br>Treatment Change: 2.4±0.6 (p< .001) | n/a                           |        |
| [15]<br>(n. sample= 10)<br><br>(Follow up at 3-<br>6mths on 3<br>children) | ACTIVITY                          |                |                          |                                                                    |                                                                   | 3 mths                        | 6 mths |
|                                                                            | Melbourne assessment              | 10             | 73.7                     |                                                                    | 77.1* (p<.05)                                                     | 66.9                          | 75.7   |
|                                                                            | Kinematic analysis:               | 10             |                          |                                                                    |                                                                   |                               |        |
|                                                                            | -peak velocity cm s <sup>-1</sup> |                | 41.1                     |                                                                    | 48.2* (p <.05)                                                    | 35                            | 37.8   |
|                                                                            | -movement units                   |                | 2.4                      |                                                                    | 2.1                                                               | 3.2                           | 2.5    |
|                                                                            | -movements time reach in sec      |                | 1.3                      |                                                                    | 1.2 ms                                                            | 1.2                           | 1.1    |
|                                                                            | -movements time grasp in sec      |                | 2.5                      |                                                                    | 1.8 ms                                                            | 2.3                           | 2.3    |
|                                                                            | PARTICIPATION                     |                |                          |                                                                    |                                                                   |                               |        |
| [16]<br>(n. sample= 3)                                                     | Parent's questionnaire            | 10             | n/a                      |                                                                    | 9/10 reported positive changes                                    | n/a                           | n/a    |
|                                                                            | BODY FUNCTIONS AND STRUCTURES     |                |                          |                                                                    |                                                                   |                               |        |
|                                                                            | Hand grip                         | 3 <sup>a</sup> | n/a                      |                                                                    | small improvement in all subjects                                 | n/a                           |        |
|                                                                            | ROM in thumb                      | 3              |                          |                                                                    | improved in all subjects                                          | n/a                           |        |
|                                                                            | ROM forefinger                    | 3              |                          |                                                                    | improved in 2 subjects                                            | n/a                           |        |
|                                                                            | ACTIVITY                          |                |                          |                                                                    |                                                                   |                               |        |
|                                                                            | JHFT (7 items)                    | 3              | n/a                      |                                                                    | All 3 subjects reduce the execution<br>time for 5 of 7 items      | n/a                           |        |

|                                                                                                                                  |                                                       |    |                  |                                  |                                   |
|----------------------------------------------------------------------------------------------------------------------------------|-------------------------------------------------------|----|------------------|----------------------------------|-----------------------------------|
|                                                                                                                                  | BOTMP                                                 | 3  |                  | no significant changes           | n/a                               |
| <b>[17]</b><br><b>(n. sample= 10)</b>                                                                                            | <b>ACTIVITY</b>                                       |    |                  |                                  |                                   |
|                                                                                                                                  | WMFT time                                             | 10 | 1.86 ± 0.52 sec. | 1.71 ± 0.70 sec. (p= 0.052)      | n/a                               |
|                                                                                                                                  | WMFT quality                                          | 10 | 3.45 ± 0.73      | 3.95 ± 0.71* (p= 0.005)          | n/a                               |
| <b>[18]</b><br><b>(n. sample= 7)</b><br><b>Follow-up= 12 days</b>                                                                | <b>ACTIVITY</b>                                       |    |                  |                                  | <b>12 days</b>                    |
|                                                                                                                                  | WMFT time                                             | 7  | 1.69 ± 0.33 sec  | 1.46 ± 0.41 (P= 0.018)           | 1.61 ± 0.38 (P= 0.446; P= 0.05)   |
|                                                                                                                                  | WMFT quality                                          | 7  | 3.73 ± 0.63      | 4.17 ± 0.70* (P= 0.016)          | 4.27 ± 0.79* (P= 0.018; P= 0.002) |
|                                                                                                                                  | <b>PARTICIPATION</b>                                  |    |                  |                                  | <b>12 days</b>                    |
|                                                                                                                                  | MAL                                                   | 7  | 3.17 ± 0.53      | 3.32 ± 0.72 (P= 0.600)           | 4.01 ± 0.72* (P= 0.018; P= 0.013) |
| <b>[19]</b><br><b>(n. sample= 16</b><br><b>divided in:</b><br><b>ipsilesional and</b><br><b>contralesional</b><br><b>groups)</b> | <b>ACTIVITY IN IPSILESIONAL GROUP (N SAMPLE=7)</b>    |    |                  |                                  |                                   |
|                                                                                                                                  | WMFT time                                             | 7  |                  | significant increase (p=0.018)*  | n/a                               |
|                                                                                                                                  | WMFT quality                                          | 7  |                  | significant increase (p= 0.016)* | n/a                               |
|                                                                                                                                  | <b>ACTIVITY IN CONTRALESIONAL GROUP (N SAMPLE= 9)</b> |    |                  |                                  |                                   |
|                                                                                                                                  | WMFT time                                             | 9  |                  | no significant change (p= 0.051) | n/a                               |
|                                                                                                                                  | WMFT quality                                          | 9  |                  | significant increase (p= 0.007)* | n/a                               |

Baseline: 3 wks before receiving CI therapy; <sup>^^</sup> Pretreatment: immediately before CI therapy; <sup>^^^</sup> Post-treatment: immediately post CI therapy; <sup>a</sup> a subjects practiced only an half of trial due to equipment technical problems, \* value reported as statistically significant. <sup>§</sup> disregard index = Quality of Upper Extremity Skills Test score – [Pediatric Motor Activity Log score/5 x 100 %].  
 abbreviations: n°: number of participants, JHFT: Jebsen Test, WMFT : Wolf Motor Function Test, time score and quality score , P-MAL-R: Pediatric Motor Activity Log-Revised; P-MAL-AUS: Pediatric Motor Activity Log Amount of Use Scale, P-MAL- QOM: Pediatric Motor Activity Log Quality of Movements; QUEST: quality upper extremity skills test; AHA: Assisting Hand Assessment, BOTMP: Bruininks–Oseretsky Test of Motor Proficiency; n/a: not available.
